# Supplementary material
Source: publisher figshare collection journal article supplement (https://diabetesjournals.figshare.com/ndownloader/files/30735872)
Supplement: Supplementary file 1 [file 30735872]

## **Supplemental Content**

Approaches: Modeling strategy

Table 1: Components of the SNAP policy index

Table 2: Number of counties with missing data in each year from 2004 to 2018 \*

Table 3: Counties excluded due to lack of diabetes prevalence data from 2004 to 2014 \*

Table 4 : Yearly SNAP, and component, policy index values by quartile of absolute change in SNAP policy index from 2004 to 2014

Table 5: States in quartiles of absolute change in SNAP policy index from 2004 to 2014

Table 6: Annual, age-adjusted adult diabetes prevalence from 2004 to 2014

Table 7: Annual, age-adjusted adult diabetes prevalence by quartile of absolute change in SNAP policy index from 2004 to 2014

Table 8: States in US Census Regions

Table 9: States in quartiles of SNAP policy index in 2004

Table 10: Random effects model – Outcome: Age-adjusted diabetes prevalence

## Approaches: Modeling strategy

### G-computation model

G-computation is a robust causal inference method for use with data containing time-dependent confounding. In particular, g-computation is able to account for time-varying confounders in cases where the exposure affects future values of confounders and vice-versa.

#### *Causal pathway*

Let  $S_t$  denote the value of the SNAP policy index at year  $t$ ,  $D_t$  denote diabetes prevalence at year  $t$ , and  $W_t$  denote confounding variables collected at time  $t$ . For simplicity, let  $W_t$  contain information from both time-varying and time-stable confounders. For a random variable  $X$ , let  $\bar{X}_t = (X_0, X_1, \dots, X_t)$  denote the covariate history up to and including interval  $t$ . We assume a causal model in which, within each interval, (1)  $W_t$  affects both  $S_t$  and  $D_t$  and (2)  $S_t$  affects  $D_t$ . We also assume that all variables collected in a given year, indexed by  $t$ , affects all variables collected in the following year, indexed by  $t + 1$ .

In our assumed causal model, the SNAP policy index affects county-level diabetes prevalence through multiple pathways. For example, the diabetes percentage during the first year of follow-up,  $D_1$ , is affected by the SNAP policy indices  $S_0$  and  $S_1$  through the “front-door” paths:

- $S_1 \rightarrow D_1$
- $S_0 \rightarrow D_1$
- $S_0 \rightarrow S_1 \rightarrow D_1$
- $S_0 \rightarrow D_0 \rightarrow D_1$
- $S_0 \rightarrow W_1 \rightarrow D_1$
- $S_0 \rightarrow D_0 \rightarrow S_1 \rightarrow D_1$
- $S_0 \rightarrow D_0 \rightarrow W_1 \rightarrow D_1$
- $S_0 \rightarrow W_1 \rightarrow S_1 \rightarrow D_1$
- $S_0 \rightarrow D_0 \rightarrow W_1 \rightarrow S_1 \rightarrow D_1$

And the “back-door” paths:

- $S_1 \leftarrow W_1 \rightarrow D_1$
- $S_1 \leftarrow W_0 \rightarrow D_1$
- $S_0 \leftarrow W_0 \rightarrow W_1 \rightarrow D_1$
- $S_0 \leftarrow W_0 \rightarrow D_0 \rightarrow D_1$
- etc.

The causal effect of  $\bar{S}_1 = (S_0, S_1)$  on  $D_1$ , consists of the effects of  $\bar{S}_1$  on  $D_1$  through the front-door paths alone. In a typical regression analysis,  $D_1$  may be regressed on exposure history,  $\bar{S}_1$ , and confounder history,  $\bar{W}_1$ . Because all backdoor paths from  $\bar{S}_1$  to  $D_1$  pass through the confounders,  $\bar{W}_1$ , this regression analysis removes the confounding effects of the back-door paths. However, part of the causal effect of  $\bar{S}_1$  on  $D_1$  is through the effect of  $\bar{S}_1$  on the confounders  $\bar{W}_1$  (e.g. the path  $S_0 \rightarrow W_1 \rightarrow D_1$ ). Blocking these pathways by conditioning on the confounding variables can bias estimates of the causal effect. Under the causal assumptions of positivity, sequentially ignorable treatment assignment, and consistency, the g-computation procedure samples from a causal model in which the back-door paths are eliminated, but all front-door paths are left intact, allowing us to use standard regression techniques to measure the effect of exposure.

#### *Longitudinal g-computation model*

Let  $X_t(\bar{s}_t)$  be the potential outcome of  $X_t$  if we intervene to set  $\bar{S}_t = \bar{s}_t$ . The g-computation estimator consists of a two-step procedure. In the first step, a Monte Carlo simulation of the potential outcomes  $D_t(\bar{s}_t)$  is performed for time points  $t = 1, \dots, T$ . In the second step, the simulated potential outcomes are regressed on the corresponding trajectories of the SNAP policy index,  $\bar{S}_t$ . Because we are interested in the causal effect of changing the SNAP policy index on the change in diabetes prevalence within a county, our final regression model is given by:

$$E[D_t(\bar{s}_t)] = \beta_0 + \beta_1 s_0 + \beta_2 * t + \beta_3 (s_t - s_0) + \beta_4 (s_t - s_0) * t.$$

The Monte Carlo algorithm used in the first step draws samples from a proposed causal model where all causal pathways between  $\bar{S}_t$  and  $D_t$  are intact while all backdoor paths have been eliminated (i.e. the relationship between  $\bar{S}_t$  and  $D_t$  is unconfounded). The data generation process under this causal model, consists of two components. The first component consists of the conditional distributions of intermediate outcomes,  $D_t$ , and confounders  $W_t$  conditional on past covariate histories, while the second is made up of the marginal distribution of  $\bar{S}_t$ . If we have maximum likelihood estimates of the conditional distributions in the first component, called the Q-functions, and the marginal exposure distribution, then we can randomly sample from the unconfounded causal model.

For the intermediate outcomes, we use the following Q-function for  $t = 0$ :

$$D_0 = \gamma_0 + \gamma_1 S_0 + \gamma_2 W_0$$

And for  $t > 0$ :

$$D_t = \eta_0 + \eta_1 S_t + \eta_2 W_t + \eta_3 S_{t-1} + \eta_4 W_{t-1} + \eta_5 * t + \eta_6 * t^2 + \eta_7 (S_t * t) + \eta_8 (S_t * t^2)$$

For each of the confounding variables, we fit a linear model conditional on all variables measured in the previous year. Because the nonparametric maximum likelihood estimator for the marginal distribution of  $\bar{S}_t$  is given by the empirical distribution, random draws of SNAP policy index trajectories are taken from the observed data distribution. After we have sampled from this unconfounded causal model, we may perform the desired regression analysis.

## Random effects model

As an alternative to the primary g-computation model, we also fit linear random effects models to assess whether the results of our analysis were robust to the analytic technique used.

Variables:

- $D_{ijt}$  = Diabetes prevalence for county  $j$ , within state  $i$ , at year  $t$
- $S_{it}$  = Unweighted SNAP policy Index for state  $i$  during year  $t$
- $W_{ijt}$  = Set of time-varying county level covariates measured for county  $j$ , within state  $i$ , at year  $t$
- $X_{ij}$  = Set of fixed county level covariates measured for county  $j$ , within state  $i$

Model:

$$D_{ijt} = \beta_{0ij} + \beta_{1ij} * t + \beta_2 S_{i0} + \beta_3 (S_{it} - S_{i0}) + \beta_4^T W_{ijt} + \beta_5^T X_{ij} + \beta_6 (S_{it} - S_{i0}) * t$$

Where:

$$\beta_{0ij} = \gamma_{0i} + \epsilon_{0ij}$$

$$\gamma_{0i} = \eta_0 + \omega_{0i}$$

And:

$$\beta_{1ij} = \gamma_{1i} + \epsilon_{1ij}$$

$$\gamma_{1i} = \eta_1 + \omega_{1i}$$

Specifically:

$W_{ijt}$  consists of the variables:

- Poverty rate
- Unemployment rate
- Median house-hold income
- Proportion of residents who are female
- Proportion of residents who are non-Hispanic Black
- Proportion of residents who are Hispanic (any race)
- Proportion of residents who are without health insurance

- Number of primary care providers per 100,000 residents
- Physical inactivity rate

$X_{ij}$  consists of the variables:

- County metropolitan status

**Table 1: Components of the SNAP policy index**

| <b>Eligibility</b>                                                                                                                                                                                                | <b>Increases or decreases index</b> |
|-------------------------------------------------------------------------------------------------------------------------------------------------------------------------------------------------------------------|-------------------------------------|
| Exempts at least one (but not all) vehicles from SNAP asset test                                                                                                                                                  | Increase                            |
| Exempts all vehicles from SNAP asset test                                                                                                                                                                         | Increase                            |
| SNAP eligibility extended to all households that are authorized to receive a noncash benefit or service financed out of Temporary Assistance for Needy Families (TANF) or State maintenance of effort (MOE) funds | Increase                            |
| Eligibility restrictions for all legal noncitizen adults                                                                                                                                                          | Decrease                            |
| <b>Transaction costs</b>                                                                                                                                                                                          |                                     |
| Proportion of working households who are required to recertify over short periods of time (1-3 months)                                                                                                            | Decrease                            |
| Simplified reporting related to changes in income                                                                                                                                                                 | Increase                            |
| Availability of online application                                                                                                                                                                                | Increase                            |
| <b>Stigma</b>                                                                                                                                                                                                     |                                     |
| Proportion of state benefits issued through electronic benefits transfer (EBT) card                                                                                                                               | Increase                            |
| Fingerprinting required during application                                                                                                                                                                        | Decrease                            |
| <b>Outreach</b>                                                                                                                                                                                                   |                                     |
| Federally funded radio or TV advertisement campaign present                                                                                                                                                       | Increase                            |

**Table 2: Number of counties with missing data in each year from 2004 to 2018 \***

| Covariates                                  | 2004  | 2005  | 2006  | 2007  | 2008  | 2009  | 2010 | 2011 | 2012 | 2013  | 2014  |
|---------------------------------------------|-------|-------|-------|-------|-------|-------|------|------|------|-------|-------|
| County metropolitan status                  | 0     | 0     | 0     | 0     | 0     | 0     | 0    | 0    | 0    | 0     | 0     |
| Proportion of county residents who are:     |       |       |       |       |       |       |      |      |      |       |       |
| Female                                      | 0     | 0     | 0     | 0     | 0     | 0     | 0    | 0    | 0    | 0     | 0     |
| Male                                        | 0     | 0     | 0     | 0     | 0     | 0     | 0    | 0    | 0    | 0     | 0     |
| Non-Hispanic White                          | 0     | 0     | 0     | 0     | 0     | 0     | 0    | 0    | 0    | 0     | 0     |
| Non-Hispanic Black                          | 0     | 0     | 0     | 0     | 0     | 0     | 0    | 0    | 0    | 0     | 0     |
| Non-Hispanic Other                          | 0     | 0     | 0     | 0     | 0     | 0     | 0    | 0    | 0    | 0     | 0     |
| Hispanic (Any race)                         | 0     | 0     | 0     | 0     | 0     | 0     | 0    | 0    | 0    | 0     | 0     |
| Poverty rate                                | 1     | 1     | 1     | 1     | 1     | 1     | 1    | 1    | 1    | 1     | 1     |
| Median household income                     | 1     | 1     | 1     | 1     | 1     | 1     | 1    | 1    | 1    | 1     | 1     |
| Unemployment rate                           | 1     | 8     | 8     | 1     | 1     | 1     | 1    | 1    | 1    | 1     | 1     |
| Physically inactive prevalence              | 0     | 0     | 0     | 0     | 0     | 0     | 0    | 0    | 0    | 0     | 0     |
| Obesity prevalence                          | 0     | 0     | 0     | 0     | 0     | 0     | 0    | 0    | 0    | 0     | 0     |
| Smoking prevalence                          | 0     | 0     | 0     | 0     | 0     | 0     | 0    | 0    | 0    | 3,135 | 3,135 |
| Number of primary care providers per capita | 3,135 | 3,135 | 3,135 | 3,135 | 3,135 | 3,135 | 0    | 0    | 0    | 0     | 0     |
| Health insurance coverage                   | 3,135 | 1     | 1     | 1     | 1     | 1     | 1    | 1    | 1    | 1     | 1     |

\* N=3,135 counties (8 counties excluded due to lack of diabetes prevalence data)

**Table 3: Counties excluded due to lack of diabetes prevalence data from 2004 to 2014**



| <b>County name</b>                        | <b>County FIPS code</b> |
|-------------------------------------------|-------------------------|
| Hoonah Angoon Census Area, Alaska         | 02105                   |
| Petersburg Census Area, Alaska            | 02195                   |
| Prince of Wales-Hyder Census Area, Alaska | 02198                   |
| Skagway Municipality, Alaska              | 02230                   |
| Wade Hampton Census Area, Alaska          | 02270                   |
| Wrangell City and Borough, Alaska         | 02275                   |
| Oglala Lakota County, South Dakota        | 46102                   |
| Bedford City, Virginia                    | 51515                   |

**Table 4 : Yearly SNAP, and component, policy index values by quartile of absolute change in SNAP policy index from 2004 to 2014 \*†**

| <b>Quartile for change in SNAP policy index (from 2004 to 2014) ‡</b> |                               | <b>2004</b> | <b>2005</b> | <b>2006</b> | <b>2007</b> | <b>2008</b> | <b>2009</b> | <b>2010</b> | <b>2011</b> | <b>2012</b> | <b>2013</b> | <b>2014</b> |
|-----------------------------------------------------------------------|-------------------------------|-------------|-------------|-------------|-------------|-------------|-------------|-------------|-------------|-------------|-------------|-------------|
| <b>First quartile</b>                                                 | <b>SNAP Policy Index</b>      | 7.3 (0.6)   | 7.5 (0.5)   | 7.5 (0.8)   | 7.5 (0.7)   | 7.5 (0.8)   | 7.6 (0.9)   | 7.7 (0.9)   | 7.8 (0.8)   | 7.9 (0.8)   | 7.9 (0.8)   | 7.9 (0.8)   |
|                                                                       | <b>Eligibility Index</b>      | 2.5 (0.4)   | 2.5 (0.4)   | 2.5 (0.4)   | 2.5 (0.4)   | 2.6 (0.4)   | 2.7 (0.5)   | 2.8 (0.5)   | 2.8 (0.5)   | 2.8 (0.5)   | 2.8 (0.5)   | 2.8 (0.5)   |
|                                                                       | <b>Transaction cost Index</b> | 2.2 (0.5)   | 2.4 (0.4)   | 2.4 (0.6)   | 2.4 (0.6)   | 2.4 (0.5)   | 2.5 (0.6)   | 2.6 (0.6)   | 2.7 (0.5)   | 2.7 (0.5)   | 2.8 (0.5)   | 2.8 (0.6)   |
|                                                                       | <b>Stigma Index</b>           | 2.3 (0.0)   | 2.3 (0.0)   | 2.3 (0.0)   | 2.3 (0.0)   | 2.3 (0.0)   | 2.3 (0.0)   | 2.3 (0.0)   | 2.3 (0.0)   | 2.3 (0.0)   | 2.3 (0.0)   | 2.3 (0.0)   |
|                                                                       | <b>Outreach Index</b>         | 0.2 (0.2)   | 0.3 (0.1)   | 0.3 (0.2)   | 0.2 (0.2)   | 0.2 (0.2)   | 0.1 (0.1)   | 0.0 (0.0)   | 0.0 (0.0)   | 0.03 (0.1)  | 0.0 (0.0)   | 0.0 (0.0)   |
| <b>Second quartile</b>                                                | <b>SNAP Policy Index</b>      | 6.7 (0.6)   | 6.8 (0.5)   | 6.9 (0.8)   | 7.1 (0.7)   | 7.2 (0.8)   | 7.3 (0.9)   | 7.8 (0.9)   | 8.0 (0.8)   | 8.1 (0.8)   | 8.1 (0.8)   | 8.1 (0.8)   |
|                                                                       | <b>Eligibility Index</b>      | 2.5 (0.4)   | 2.6 (0.4)   | 2.6 (0.4)   | 2.6 (0.4)   | 2.7 (0.4)   | 2.8 (0.5)   | 3.0 (0.5)   | 3.2 (0.5)   | 3.2 (0.5)   | 3.2 (0.5)   | 3.2 (0.5)   |
|                                                                       | <b>Transaction cost Index</b> | 1.7 (0.5)   | 1.8 (0.4)   | 1.9 (0.6)   | 2.0 (0.6)   | 2.1 (0.5)   | 2.2 (0.6)   | 2.4 (0.6)   | 2.5 (0.5)   | 2.6 (0.5)   | 2.6 (0.5)   | 2.6 (0.6)   |
|                                                                       | <b>Stigma Index</b>           | 2.3 (0.0)   | 2.3 (0.0)   | 2.3 (0.0)   | 2.3 (0.0)   | 2.3 (0.0)   | 2.3 (0.0)   | 2.3 (0.0)   | 2.3 (0.0)   | 2.3 (0.0)   | 2.3 (0.0)   | 2.3 (0.0)   |
|                                                                       | <b>Outreach Index</b>         | 0.2 (0.2)   | 0.2 (0.1)   | 0.2 (0.2)   | 0.2 (0.2)   | 0.2 (0.2)   | 0.1 (0.1)   | 0.02 (0.0)  | 0.04 (0.0)  | 0.04 (0.1)  | 0.0 (0.0)   | 0.0 (0.0)   |
| <b>Third quartile</b>                                                 | <b>SNAP Policy Index</b>      | 6.0 (0.6)   | 6.6 (0.5)   | 6.7 (0.8)   | 7.0 (0.7)   | 7.1 (0.8)   | 7.4 (0.9)   | 7.6 (0.9)   | 8.0 (0.8)   | 8.1 (0.8)   | 8.3 (0.8)   | 8.3 (0.8)   |
|                                                                       | <b>Eligibility Index</b>      | 2.3 (0.4)   | 2.4 (0.4)   | 2.4 (0.4)   | 2.5 (0.4)   | 2.5 (0.4)   | 2.8 (0.5)   | 3.0 (0.5)   | 3.2 (0.5)   | 3.2 (0.5)   | 3.2 (0.5)   | 3.2 (0.5)   |
|                                                                       | <b>Transaction cost Index</b> | 1.4 (0.5)   | 1.7 (0.4)   | 1.8 (0.6)   | 2.0 (0.6)   | 2.1 (0.5)   | 2.2 (0.6)   | 2.3 (0.6)   | 2.5 (0.5)   | 2.6 (0.5)   | 2.8 (0.5)   | 2.8 (0.6)   |

|                        |                               |           |           |           |           |           |           |            |           |           |           |           |
|------------------------|-------------------------------|-----------|-----------|-----------|-----------|-----------|-----------|------------|-----------|-----------|-----------|-----------|
|                        | <b>Stigma Index</b>           | 2.1 (0.0) | 2.2 (0.0) | 2.2 (0.0) | 2.2 (0.0) | 2.2 (0.0) | 2.2 (0.0) | 2.2 (0.0)  | 2.3 (0.0) | 2.3 (0.0) | 2.3 (0.0) | 2.3 (0.0) |
|                        | <b>Outreach Index</b>         | 0.2 (0.2) | 0.2 (0.1) | 0.2 (0.2) | 0.3 (0.2) | 0.2 (0.2) | 0.1 (0.1) | 0.03 (0.0) | 0.1 (0.0) | 0.1 (0.1) | 0.0 (0.0) | 0.0 (0.0) |
|                        |                               |           |           |           |           |           |           |            |           |           |           |           |
| <b>Fourth quartile</b> | <b>SNAP Policy Index</b>      | 5.5 (0.6) | 6.0 (0.5) | 6.3 (0.8) | 6.6 (0.7) | 6.9 (0.8) | 7.4 (0.9) | 7.8 (0.9)  | 8.3 (0.8) | 8.4 (0.8) | 8.5 (0.8) | 8.6 (0.8) |
|                        | <b>Eligibility Index</b>      | 1.8 (0.4) | 1.8 (0.4) | 1.9 (0.4) | 2.2 (0.4) | 2.4 (0.4) | 2.8 (0.5) | 3.0 (0.5)  | 3.1 (0.5) | 3.2 (0.5) | 3.2 (0.5) | 3.2 (0.5) |
|                        | <b>Transaction cost Index</b> | 1.4 (0.5) | 1.7 (0.4) | 1.9 (0.6) | 1.9 (0.6) | 2.1 (0.5) | 2.3 (0.6) | 2.5 (0.6)  | 2.7 (0.5) | 2.9 (0.5) | 3.0 (0.5) | 3.1 (0.6) |
|                        | <b>Stigma Index</b>           | 2.0 (0.0) | 2.2 (0.0) | 2.2 (0.0) | 2.2 (0.0) | 2.3 (0.0) | 2.3 (0.0) | 2.3 (0.0)  | 2.3 (0.0) | 2.3 (0.0) | 2.3 (0.0) | 2.3 (0.0) |
|                        | <b>Outreach Index</b>         | 0.3 (0.2) | 0.3 (0.1) | 0.3 (0.2) | 0.3 (0.2) | 0.2 (0.2) | 0.1 (0.1) | 0.1 (0.0)  | 0.2 (0.0) | 0.1 (0.1) | 0.0 (0.0) | 0.0 (0.0) |

\* SNAP policy index is scaled to be from 1 to 10 and is the sum of the eligibility, transaction cost, stigma and outreach indices.

† All data presented as means (standard deviations)

‡ Absolute change in SNAP policy index from 2004 to 2014. First quartile: 0 to 0.9 (N=834 counties), second quartile: 0.9 to 1.9 (N=746 counties), third quartile: 2.0 to 2.6 (N=876 counties), fourth quartile: 2.7 to 4.2 (N=679 counties).

**Table 5: States in quartiles of absolute change in SNAP policy index from 2004 to 2014 \*†**

| <b>First quartile (N=834 counties)</b>                                                                                                     | <b>Second quartile (N=746 counties)</b>                                                                                                                                                                                                    | <b>Third quartile (N=876 counties)</b>                                                                                  | <b>Fourth quartile (N=679 counties)</b>                                                                                                     |
|--------------------------------------------------------------------------------------------------------------------------------------------|--------------------------------------------------------------------------------------------------------------------------------------------------------------------------------------------------------------------------------------------|-------------------------------------------------------------------------------------------------------------------------|---------------------------------------------------------------------------------------------------------------------------------------------|
| Alaska<br>Arkansas<br>Delaware<br>Indiana<br>Kansas<br>Kentucky<br>Missouri<br>Pennsylvania<br>South Carolina<br>Virginia<br>West Virginia | Arizona<br>Colorado<br>Connecticut<br>District of Columbia<br>Hawaii<br>Louisiana<br>Maine<br>Maryland<br>Massachusetts<br>Michigan<br>New Hampshire<br>New Mexico<br>North Carolina<br>Oklahoma<br>South Dakota<br>Tennessee<br>Wisconsin | Idaho<br>Illinois<br>Iowa<br>Mississippi<br>Montana<br>North Dakota<br>Ohio<br>Oregon<br>Texas<br>Washington<br>Wyoming | Alabama<br>California<br>Florida<br>Georgia<br>Minnesota<br>Nebraska<br>Nevada<br>New Jersey<br>New York<br>Rhode Island<br>Utah<br>Vermont |

\* Quartiles calculated at the county level. 8 counties were excluded due to lack of diabetes prevalence data.

† Absolute change in SNAP policy index from 2004 to 2014. First quartile: 0 to 0.9, second quartile: 0.9 to 1.9, third quartile: 2.0 to 2.6, fourth quartile: 2.7 to 4.2.

**Table 6: Annual, age-adjusted adult diabetes prevalence from 2004 to 2014 \*†**

|             | <b>Total</b> | <b>Male</b> | <b>Female</b> |
|-------------|--------------|-------------|---------------|
| <b>2004</b> | 7.3 (1.3)    | 7.8 (1.1)   | 6.8 (1.4)     |
| <b>2005</b> | 7.5 (1.3)    | 8.2 (1.2)   | 7.0 (1.5)     |
| <b>2006</b> | 8.0 (1.5)    | 8.7 (1.4)   | 7.4 (1.6)     |
| <b>2007</b> | 8.3 (1.6)    | 9.0 (1.5)   | 7.7 (1.7)     |
| <b>2008</b> | 8.5 (1.6)    | 9.3 (1.5)   | 7.9 (1.7)     |
| <b>2009</b> | 8.7 (1.6)    | 9.5 (1.5)   | 8.1 (1.7)     |
| <b>2010</b> | 8.9 (1.6)    | 9.6 (1.6)   | 8.3 (1.8)     |
| <b>2011</b> | 9.0 (1.7)    | 9.7 (1.6)   | 8.4 (1.8)     |
| <b>2012</b> | 9.1 (1.7)    | 9.7 (1.6)   | 8.5 (1.9)     |
| <b>2013</b> | 9.1 (1.7)    | 9.8 (1.6)   | 8.6 (1.9)     |
| <b>2014</b> | 9.1 (1.8)    | 9.8 (1.6)   | 8.6 (2.0)     |

\* Age-adjusted prevalence of diagnosed diabetes for all adults 20 years of age and older obtained from the Centers for Disease Control and Prevention's US Diabetes Surveillance System derived from the Behavioral Risk Factor Surveillance System

† All data presented as means (standard deviations)

**Table 7: Annual, age-adjusted adult diabetes prevalence by quartile of absolute change in SNAP policy index from 2004 to 2014 \*†‡**

|             | <b>First quartile (N=834 counties)</b> | <b>Second quartile (N=746 counties)</b> | <b>Third quartile (N=876 counties)</b> | <b>Fourth quartile (N=679 counties)</b> |
|-------------|----------------------------------------|-----------------------------------------|----------------------------------------|-----------------------------------------|
| <b>2004</b> | 7.8 (1.2)                              | 7.3 (1.5)                               | 7.4 (1.1)                              | 6.9 (1.1)                               |
| <b>2005</b> | 8.0 (1.3)                              | 7.6 (1.6)                               | 7.6 (1.1)                              | 7.2 (1.2)                               |
| <b>2006</b> | 8.4 (1.4)                              | 8.1 (1.7)                               | 8.3 (1.3)                              | 7.7 (1.4)                               |
| <b>2007</b> | 8.7 (1.5)                              | 8.4 (1.9)                               | 8.5 (1.4)                              | 7.9 (1.5)                               |
| <b>2008</b> | 9.1 (1.5)                              | 8.5 (1.9)                               | 8.7 (1.4)                              | 8.2 (1.4)                               |
| <b>2009</b> | 9.4 (1.4)                              | 8.7 (1.8)                               | 8.8 (1.4)                              | 8.4 (1.5)                               |
| <b>2010</b> | 9.6 (1.5)                              | 8.9 (1.9)                               | 9.0 (1.4)                              | 8.5 (1.5)                               |
| <b>2011</b> | 9.7 (1.7)                              | 9.0 (2.0)                               | 9.1 (1.4)                              | 8.6 (1.5)                               |
| <b>2012</b> | 9.7 (1.7)                              | 9.1 (2.0)                               | 9.1 (1.4)                              | 8.7 (1.6)                               |
| <b>2013</b> | 9.8 (1.8)                              | 9.1 (1.9)                               | 9.1 (1.4)                              | 8.8 (1.6)                               |
| <b>2014</b> | 10.0 (1.8)                             | 9.1 (1.9)                               | 9.2 (1.4)                              | 8.7 (1.7)                               |

\* Age-adjusted prevalence of diagnosed diabetes for all adults 20 years of age and older obtained from the Centers for Disease Control and Prevention’s US Diabetes Surveillance System derived from the Behavioral Risk Factor Surveillance System

† All data presented as means (standard deviations)

‡ Absolute change in SNAP policy index from 2004 to 2014. First quartile: 0 to 0.9, second quartile: 0.9 to 1.9, third quartile: 2.0 to 2.6, fourth quartile: 2.7 to 4.2.

**Table 8: States in US Census Regions**

| <b>Northeast</b> | <b>Midwest</b> | <b>South</b>         | <b>West</b> |
|------------------|----------------|----------------------|-------------|
| Connecticut      | Illinois       | Alabama              | Alaska      |
| Maine            | Indiana        | Arkansas             | Arizona     |
| Massachusetts    | Iowa           | Delaware             | California  |
| New Hampshire    | Kansas         | District of Columbia | Colorado    |
| New Jersey       | Michigan       | Florida              | Hawaii      |
| New York         | Minnesota      | Georgia              | Idaho       |
| Pennsylvania     | Missouri       | Kentucky             | Montana     |
| Rhode Island     | Nebraska       | Louisiana            | Nevada      |
| Vermont          | North Dakota   | Maryland             | New Mexico  |
|                  | Ohio           | Mississippi          | Oregon      |
|                  | South Dakota   | North Carolina       | Utah        |
|                  | Wisconsin      | Oklahoma             | Washington  |
|                  |                | South Carolina       | Wyoming     |
|                  |                | Tennessee            |             |
|                  |                | Texas                |             |
|                  |                | Virginia             |             |
|                  |                | West Virginia        |             |

**Table 9: States in quartiles of SNAP policy index in 2004\*†**

| <b>First quartile (N=848 counties)</b> | <b>Second quartile (N=739 counties)</b> | <b>Third quartile (N=845 counties)</b> | <b>Fourth quartile (N=703 counties)</b> |
|----------------------------------------|-----------------------------------------|----------------------------------------|-----------------------------------------|
| California                             | Alabama                                 | Alaska                                 | Arkansas                                |
| Georgia                                | Arizona                                 | Colorado                               | Delaware                                |
| Idaho                                  | Connecticut                             | District of Columbia                   | Kansas                                  |
| Minnesota                              | Florida                                 | Illinois                               | Maine                                   |
| Mississippi                            | Hawaii                                  | Indiana                                | Maryland                                |
| Nebraska                               | Iowa                                    | Kentucky                               | Massachusetts                           |
| Rhode Island                           | Nevada                                  | Louisiana                              | Michigan                                |
| Texas                                  | New Jersey                              | Missouri                               | New Hampshire                           |
| Utah                                   | New York                                | Montana                                | Pennsylvania                            |
| Vermont                                | North Dakota                            | New Mexico                             | South Carolina                          |
| Wyoming                                | Ohio                                    | North Carolina                         | Virginia                                |
|                                        | Oklahoma                                | Oregon                                 | West Virginia                           |
|                                        | South Dakota                            | Washington                             | Wisconsin                               |
|                                        | Tennessee                               |                                        |                                         |

\* Quartiles calculated at the county level. 8 counties were excluded due to lack of diabetes prevalence data.

† Snap policy index range - First quartile: 3.8 to 5.8, second quartile: 5.8 to 6.4, third quartile: 6.4 to 6.9, fourth quartile: 7.0 to 8.1



**Table 10: Random effects model – Outcome: Age-adjusted diabetes prevalence \***

| <b>Variable</b>                                               | <b>Estimate</b> | <b>95% Lower Confidence Limit</b> | <b>95% Upper Confidence Limit</b> | <b>p-value</b> |
|---------------------------------------------------------------|-----------------|-----------------------------------|-----------------------------------|----------------|
| Intercept                                                     | 2.05            | 0.59                              | 3.52                              | 0.006          |
| Baseline SNAP policy index (in 2004)                          | 0.24            | 0.23                              | 0.26                              | <0.001         |
| Year                                                          | 0.32            | 0.11                              | 0.53                              | 0.004          |
| Absolute change in SNAP policy index from 2004 to 2014        | 0.35            | 0.33                              | 0.37                              | <0.001         |
| Year × Absolute change in SNAP policy index from 2004 to 2014 | -0.061          | -0.064                            | -0.058                            | <0.001         |
| Proportion of residents female                                | 0.009           | -0.001                            | 0.019                             | 0.06           |
| Proportion of residents non-Hispanic Black                    | 0.042           | 0.040                             | 0.045                             | <0.001         |
| Proportion of residents Hispanic (any race)                   | -0.006          | -0.008                            | -0.003                            | <0.001         |
| Poverty rate                                                  | 0.029           | 0.024                             | 0.034                             | <0.001         |
| Median household income                                       | 0.012           | -0.015                            | 0.039                             | 0.38           |
| Unemployment rate                                             | 0.002           | -0.002                            | 0.006                             | 0.23           |
| Proportion of residents that are physically inactive          | 0.081           | 0.077                             | 0.085                             | <0.001         |
| Primary care providers per 100,000 residents                  | -0.001          | -0.002                            | 0.0002                            | 0.09           |
| Proportion of residents without health insurance              | 0.011           | 0.007                             | 0.015                             | <0.001         |
| Non-metropolitan county                                       | 0.003           | -0.047                            | 0.054                             | 0.89           |

\* Age-adjusted prevalence of diagnosed diabetes for all adults 20 years of age and older obtained from the Centers for Disease Control and Prevention's US Diabetes Surveillance System derived from the Behavioral Risk Factor Surveillance System
